# Supplementary material for: Short-term effects of cold spells on hospitalisations for acute exacerbation of chronic obstructive pulmonary disease: a time-series study in Beijing, China
Source: PubMed Central journal article supplement (PMC7789453; doi:10.1136/bmjopen-2020-039745), 2021-01-06
Supplement: bmjopen-2020-039745supp001.pdf [file bmjopen-2020-039745supp001.pdf]

**Table S1** The cumulative effects of cold spells under the optimal definition using different degrees of freedom for lag dimension in the DLM model

| df for lag dimension | Group  | CRR (95% CI)            |                         |                         |                          |
|----------------------|--------|-------------------------|-------------------------|-------------------------|--------------------------|
|                      |        | Lag0                    | Lag0-7                  | Lag0-14                 | Lag0-21                  |
| 3 <sup>a</sup>       | Total  | 1.042<br>(1.013-1.072)* | 1.249<br>(1.136-1.374)* | 1.343<br>(1.206-1.496)* | 1.394<br>(1.193-1.630)*  |
|                      | Male   | 1.042<br>(1.011-1.074)* | 1.243<br>(1.123-1.375)* | 1.316<br>(1.173-1.477)* | 1.342<br>(1.136-1.586)*  |
|                      | Female | 1.041<br>(1.005-1.077)* | 1.257<br>(1.119-1.411)* | 1.383<br>(1.215-1.574)* | 1.476<br>(1.211-1.783)*  |
|                      | Age<65 | 1.017<br>(0.972-1.064)  | 1.120<br>(0.963-1.303)  | 1.159<br>(0.977-1.376)  | 1.107<br>(0.862-1.422)   |
|                      | Age≥65 | 1.046<br>(1.017-1.077)* | 1.275<br>(1.158-1.404)* | 1.382<br>(1.240-1.540)* | 1.456<br>(1.244-1.705)*  |
|                      | Total  | 0.989<br>(0.926-1.057)  | 1.265<br>(1.149-1.392)* | 1.311<br>(1.173-1.465)* | 1.382<br>(1.182-1.615)*  |
| 4                    | Male   | 0.992<br>(0.925-1.064)  | 1.257<br>(1.135-1.393)* | 1.285<br>(1.141-1.448)* | 1.331<br>(1.126-1.573)*  |
|                      | Female | 0.983<br>(0.906-1.067)  | 1.274<br>(1.133-1.432)* | 1.347<br>(1.178-1.540)* | 1.462 (1.210-<br>1.766)* |
|                      | Age<65 | 0.919<br>(0.827-1.022)  | 1.151<br>(0.988-1.340)  | 1.106<br>(0.926-1.320)  | 1.091<br>(0.850-1.401)   |
|                      | Age≥65 | 1.003<br>(0.938-1.073)  | 1.288<br>(1.169-1.419)* | 1.355<br>(1.211-1.515)* | 1.446<br>(1.235-1.692)*  |
|                      | Total  | 1.001<br>(0.888-1.128)  | 1.271<br>(1.150-1.404)* | 1.313<br>(1.174-1.468)* | 1.389<br>(1.185-1.628)*  |
| 5                    | Male   | 0.999<br>(0.880-1.136)  | 1.261<br>(1.134-1.403)* | 1.287<br>(1.141-1.451)* | 1.336<br>(1.127-1.583)*  |
|                      | Female | 1.004<br>(0.868-1.161)  | 1.285<br>(1.137-1.451)* | 1.350<br>(1.180-1.545)* | 1.474<br>(1.216-1.787)*  |
|                      | Age<65 | 0.892<br>(0.737-1.080)  | 1.143<br>(0.975-1.341)  | 1.102<br>(0.922-1.317)  | 1.084<br>(0.840-1.398)   |
|                      | Age≥65 | 1.023<br>(0.907-1.155)  | 1.297<br>(1.172-1.434)* | 1.358<br>(1.213-1.520)* | 1.456<br>(1.240-1.710)*  |
|                      | Total  | 1.001<br>(0.888-1.128)  | 1.271<br>(1.150-1.404)* | 1.313<br>(1.174-1.468)* | 1.389<br>(1.185-1.628)*  |

CI, confidence interval; df, degree of freedom; RR, relative risk.

\* $P < 0.05$ .<sup>a</sup>Used in the study.
