# Supplementary material for: Short-term effects of cold spells on hospitalisations for acute exacerbation of chronic obstructive pulmonary disease: a time-series study in Beijing, China
Source: PubMed Central journal article supplement (PMC7789453; doi:10.1136/bmjopen-2020-039745), 2021-01-06
Supplement: bmjopen-2020-039745supp002.pdf [file bmjopen-2020-039745supp002.pdf]

**Table S2** The cumulative effects of cold spells under the optimal definition using different degrees of freedom for time per year in the DLM model

| df for time per year | Group  | CRR (95% CI)            |                         |                         |                         |
|----------------------|--------|-------------------------|-------------------------|-------------------------|-------------------------|
|                      |        | Lag0                    | Lag0-7                  | Lag0-14                 | Lag0-21                 |
| 3 <sup>a</sup>       | Total  | 1.042<br>(1.013-1.072)* | 1.249<br>(1.136-1.374)* | 1.343<br>(1.206-1.496)* | 1.394<br>(1.193-1.630)* |
|                      | Male   | 1.042<br>(1.011-1.074)* | 1.243<br>(1.123-1.375)* | 1.316<br>(1.173-1.477)* | 1.342<br>(1.136-1.586)* |
|                      | Female | 1.041<br>(1.005-1.077)* | 1.257<br>(1.119-1.411)* | 1.383<br>(1.215-1.574)* | 1.476<br>(1.211-1.783)* |
|                      | Age<65 | 1.017<br>(0.972-1.064)  | 1.120<br>(0.963-1.303)  | 1.159<br>(0.977-1.376)  | 1.107<br>(0.862-1.422)  |
|                      | Age≥65 | 1.046<br>(1.017-1.077)* | 1.275<br>(1.158-1.404)* | 1.382<br>(1.240-1.540)* | 1.456<br>(1.244-1.705)* |
|                      | Total  | 1.023<br>(0.992-1.055)  | 1.150<br>(1.033-1.280)* | 1.218<br>(1.078-1.376)* | 1.233<br>(1.036-1.467)* |
| 4                    | Male   | 1.029<br>(0.997-1.063)  | 1.173<br>(1.045-1.316)* | 1.226<br>(1.074-1.399)* | 1.225<br>(1.015-1.480)* |
|                      | Female | 1.011<br>(0.974-1.050)  | 1.107<br>(0.971-1.262)  | 1.196<br>(1.034-1.385)* | 1.232<br>(0.998-1.520)  |
|                      | Age<65 | 1.010<br>(0.961-1.061)  | 1.077<br>(0.906-1.280)  | 1.105<br>(0.907-1.345)  | 1.056<br>(0.795-1.401)  |
|                      | Age≥65 | 1.026<br>(0.995-1.058)  | 1.166<br>(1.046-1.300)* | 1.244<br>(1.100-1.406)* | 1.272<br>(1.067-1.517)* |
|                      | Total  | 1.022<br>(0.990-1.056)  | 1.144<br>(1.008-1.298)* | 1.208<br>(1.031-1.415)* | 1.222<br>(0.978-1.526)  |
| 5                    | Male   | 1.030<br>(0.994-1.066)  | 1.171<br>(1.021-1.343)* | 1.222<br>(1.027-1.452)* | 1.223<br>(0.960-1.559)  |
|                      | Female | 1.009<br>(0.970-1.050)  | 1.093<br>(0.938-1.275)  | 1.174<br>(0.972-1.418)  | 1.203<br>(0.923-1.569)  |
|                      | Age<65 | 1.011<br>(0.959-1.066)  | 1.082<br>(0.883-1.327)  | 1.127<br>(0.874-1.453)  | 1.127<br>(0.788-1.612)  |
|                      | Age≥65 | 1.025<br>(0.992-1.059)  | 1.158<br>(1.019-1.316)* | 1.227<br>(1.045-1.440)* | 1.245<br>(0.994-1.559)  |
|                      | Total  | 1.022<br>(0.990-1.056)  | 1.144<br>(1.008-1.298)* | 1.208<br>(1.031-1.415)* | 1.222<br>(0.978-1.526)  |

CI, confidence interval; df, degree of freedom; RR, relative risk.

\**P*<0.05.<sup>a</sup>Used in the study.
