# Supplementary material for: Short-term effects of cold spells on hospitalisations for acute exacerbation of chronic obstructive pulmonary disease: a time-series study in Beijing, China
Source: PubMed Central journal article supplement (PMC7789453; doi:10.1136/bmjopen-2020-039745), 2021-01-06
Supplement: bmjopen-2020-039745supp003.pdf [file bmjopen-2020-039745supp003.pdf]

**Table S3** The cumulative effects of cold spells under the optimal definition using different degrees of freedom for relative humidity in the DLM model

| df for relative humidity | Group  | CRR (95% CI)            |                         |                         |                         |
|--------------------------|--------|-------------------------|-------------------------|-------------------------|-------------------------|
|                          |        | Lag0                    | Lag0-7                  | Lag0-14                 | Lag0-21                 |
| 3 <sup>a</sup>           | Total  | 1.042<br>(1.013-1.072)* | 1.249<br>(1.136-1.374)* | 1.343<br>(1.206-1.496)* | 1.394<br>(1.193-1.630)* |
|                          | Male   | 1.042<br>(1.011-1.074)* | 1.243<br>(1.123-1.375)* | 1.316<br>(1.173-1.477)* | 1.342<br>(1.136-1.586)* |
|                          | Female | 1.041<br>(1.005-1.077)* | 1.257<br>(1.119-1.411)* | 1.383<br>(1.215-1.574)* | 1.476<br>(1.211-1.783)* |
|                          | Age<65 | 1.017<br>(0.972-1.064)  | 1.120<br>(0.963-1.303)  | 1.159<br>(0.977-1.376)  | 1.107<br>(0.862-1.422)  |
|                          | Age≥65 | 1.046<br>(1.017-1.077)* | 1.275<br>(1.158-1.404)* | 1.382<br>(1.240-1.540)* | 1.456<br>(1.244-1.705)* |
|                          | Total  | 1.041<br>(1.012-1.071)* | 1.248<br>(1.135-1.373)* | 1.343<br>(1.205-1.495)* | 1.392<br>(1.190-1.629)* |
| 4                        | Male   | 1.042<br>(1.011-1.073)* | 1.240<br>(1.120-1.372)* | 1.314<br>(1.170-1.475)* | 1.336<br>(1.130-1.580)* |
|                          | Female | 1.041<br>(1.006-1.078)* | 1.259<br>(1.120-1.414)* | 1.385<br>(1.217-1.578)* | 1.482<br>(1.225-1.792)* |
|                          | Age<65 | 1.017<br>(0.972-1.064)  | 1.119<br>(0.961-1.302)  | 1.158<br>(0.975-1.375)  | 1.105<br>(0.859-1.420)  |
|                          | Age≥65 | 1.046<br>(1.017-1.076)* | 1.274<br>(1.157-1.403)* | 1.381<br>(1.239-1.540)* | 1.455<br>(1.242-1.704)* |
|                          | Total  | 1.041<br>(1.012-1.071)* | 1.244<br>(1.131-1.369)* | 1.337<br>(1.200-1.490)* | 1.383<br>(1.182-1.619)* |
|                          | Male   | 1.041<br>(1.010-1.073)* | 1.236<br>(1.116-1.368)* | 1.307<br>(1.164-1.468)* | 1.327<br>(1.121-1.569)* |
| 5                        | Female | 1.040<br>(1.005-1.077)* | 1.256<br>(1.117-1.411)* | 1.381<br>(1.212-1.574)* | 1.474<br>(1.218-1.785)* |
|                          | Age<65 | 1.015<br>(0.970-1.062)  | 1.111<br>(0.955-1.293)  | 1.148<br>(0.967-1.363)  | 1.089<br>(0.847-1.400)  |
|                          | Age≥65 | 1.046<br>(1.016-1.076)* | 1.271<br>(1.154-1.400)* | 1.377<br>(1.234-1.536)* | 1.448<br>(1.235-1.697)* |

CI, confidence interval; df, degree of freedom; RR, relative risk.

\**P*<0.05.<sup>a</sup>Used in the study.
