# Supplementary material for: Short-term effects of cold spells on hospitalisations for acute exacerbation of chronic obstructive pulmonary disease: a time-series study in Beijing, China
Source: PubMed Central journal article supplement (PMC7789453; doi:10.1136/bmjopen-2020-039745), 2021-01-06
Supplement: bmjopen-2020-039745supp004.pdf [file bmjopen-2020-039745supp004.pdf]

**Table S4** The cumulative effects of cold spells under the optimal definition using different degrees of freedom for air pressure in the DLM model

| df for air pressure | Group                   | CRR (95% CI)            |                         |                         |                         |
|---------------------|-------------------------|-------------------------|-------------------------|-------------------------|-------------------------|
|                     |                         | Lag0                    | Lag0-7                  | Lag0-14                 | Lag0-21                 |
| 3 <sup>a</sup>      | Total                   | 1.042<br>(1.013-1.072)* | 1.249<br>(1.136-1.374)* | 1.343<br>(1.206-1.496)* | 1.394<br>(1.193-1.630)* |
|                     | Male                    | 1.042<br>(1.011-1.074)* | 1.243<br>(1.123-1.375)* | 1.316<br>(1.173-1.477)* | 1.342<br>(1.136-1.586)* |
|                     | Female                  | 1.041<br>(1.005-1.077)* | 1.257<br>(1.119-1.411)* | 1.383<br>(1.215-1.574)* | 1.476<br>(1.211-1.783)* |
|                     | Age<65                  | 1.017<br>(0.972-1.064)  | 1.120<br>(0.963-1.303)  | 1.159<br>(0.977-1.376)  | 1.107<br>(0.862-1.422)  |
|                     | Age≥65                  | 1.046<br>(1.017-1.077)* | 1.275<br>(1.158-1.404)* | 1.382<br>(1.240-1.540)* | 1.456<br>(1.244-1.705)* |
|                     | 4                       | Total                   | 1.042<br>(1.012-1.071)* | 1.248<br>(1.134-1.373)* | 1.342<br>(1.205-1.495)* |
| Male                | 1.042<br>(1.011-1.074)* | 1.240<br>(1.120-1.373)* | 1.313<br>(1.170-1.475)* | 1.340<br>(1.134-1.584)* |                         |
| Female              | 1.041<br>(1.005-1.078)* | 1.259<br>(1.120-1.414)* | 1.385<br>(1.216-1.578)* | 1.478<br>(1.223-1.786)* |                         |
| Age<65              | 1.018<br>(0.973-1.065)  | 1.123<br>(0.965-1.306)  | 1.162<br>(0.978-1.380)  | 1.109<br>(0.863-1.425)  |                         |
| Age≥65              | 1.046<br>(1.016-1.076)* | 1.273<br>(1.156-1.402)* | 1.380<br>(1.238-1.539)* | 1.455<br>(1.242-1.704)* |                         |
| 5                   | Total                   | 1.041<br>(1.012-1.071)* | 1.247<br>(1.133-1.373)* | 1.342<br>(1.204-1.495)* | 1.393<br>(1.191-1.629)* |
|                     | Male                    | 1.042<br>(1.011-1.074)* | 1.240<br>(1.120-1.374)* | 1.314<br>(1.170-1.476)* | 1.341<br>(1.134-1.585)* |
|                     | Female                  | 1.041<br>(1.005-1.077)* | 1.257<br>(1.118-1.413)* | 1.383<br>(1.214-1.576)* | 1.475<br>(1.220-1.784)* |
|                     | Age<65                  | 1.019<br>(0.974-1.067)  | 1.129<br>(0.970-1.314)  | 1.168<br>(0.984-1.388)  | 1.115<br>(0.868-1.433)  |
|                     | Age≥65                  | 1.046<br>(1.016-1.076)* | 1.271<br>(1.154-1.401)* | 1.378<br>(1.235-1.537)* | 1.452<br>(1.240-1.701)* |

CI, confidence interval; df, degree of freedom; RR, relative risk.

\**P*<0.05.<sup>a</sup>Used in the study.
