# Supplementary material for: Short-term effects of cold spells on hospitalisations for acute exacerbation of chronic obstructive pulmonary disease: a time-series study in Beijing, China
Source: PubMed Central journal article supplement (PMC7789453; doi:10.1136/bmjopen-2020-039745), 2021-01-06
Supplement: bmjopen-2020-039745supp005.pdf [file bmjopen-2020-039745supp005.pdf]

**Table S5** The cumulative effects of cold spells under the optimal definition using different degrees of freedom for air quality index in the DLM model

| df for AQI     | Group  | CRR (95% CI)            |                         |                         |                         |
|----------------|--------|-------------------------|-------------------------|-------------------------|-------------------------|
|                |        | Lag0                    | Lag0-7                  | Lag0-14                 | Lag0-21                 |
| 3 <sup>a</sup> | Total  | 1.042<br>(1.013-1.072)* | 1.249<br>(1.136-1.374)* | 1.343<br>(1.206-1.496)* | 1.394<br>(1.193-1.630)* |
|                | Male   | 1.042<br>(1.011-1.074)* | 1.243<br>(1.123-1.375)* | 1.316<br>(1.173-1.477)* | 1.342<br>(1.136-1.586)* |
|                | Female | 1.041<br>(1.005-1.077)* | 1.257<br>(1.119-1.411)* | 1.383<br>(1.215-1.574)* | 1.476<br>(1.211-1.783)* |
|                | Age<65 | 1.017<br>(0.972-1.064)  | 1.120<br>(0.963-1.303)  | 1.159<br>(0.977-1.376)  | 1.107<br>(0.862-1.422)  |
|                | Age≥65 | 1.046<br>(1.017-1.077)* | 1.275<br>(1.158-1.404)* | 1.382<br>(1.240-1.540)* | 1.456<br>(1.244-1.705)* |
|                | Total  | 1.042<br>(1.013-1.072)* | 1.249<br>(1.135-1.374)* | 1.342<br>(1.205-1.495)* | 1.393<br>(1.192-1.629)* |
| 4              | Male   | 1.042<br>(1.012-1.074)* | 1.242<br>(1.123-1.375)* | 1.315<br>(1.171-1.476)* | 1.342<br>(1.135-1.586)* |
|                | Female | 1.041<br>(1.005-1.077)* | 1.257<br>(1.119-1.412)* | 1.382<br>(1.214-1.573)* | 1.475<br>(1.221-1.783)* |
|                | Age<65 | 1.018<br>(0.973-1.065)  | 1.120<br>(0.963-1.303)  | 1.157<br>(0.974-1.373)  | 1.106<br>(0.861-1.421)  |
|                | Age≥65 | 1.046<br>(1.017-1.077)* | 1.275<br>(1.158-1.404)* | 1.381<br>(1.239-1.539)* | 1.456<br>(1.243-1.704)* |
|                | Total  | 1.042<br>(1.013-1.071)* | 1.249<br>(1.136-1.373)* | 1.347<br>(1.210-1.500)* | 1.405<br>(1.202-1.643)* |
|                | Male   | 1.042<br>(1.011-1.074)* | 1.242<br>(1.123-1.373)* | 1.320<br>(1.177-1.480)* | 1.355<br>(1.148-1.601)* |
| 5              | Female | 1.041<br>(1.005-1.077)* | 1.257<br>(1.119-1.412)* | 1.385<br>(1.216-1.577)* | 1.482<br>(1.226-1.792)* |
|                | Age<65 | 1.018<br>(0.973-1.065)  | 1.120<br>(0.963-1.303)  | 1.161<br>(0.978-1.378)  | 1.116<br>(0.869-1.433)  |
|                | Age≥65 | 1.046<br>(1.017-1.076)* | 1.275<br>(1.159-1.403)* | 1.386<br>(1.243-1.545)* | 1.468<br>(1.254-1.718)* |
|                | Total  | 1.042<br>(1.013-1.071)* | 1.249<br>(1.136-1.373)* | 1.347<br>(1.210-1.500)* | 1.405<br>(1.202-1.643)* |
|                | Male   | 1.042<br>(1.011-1.074)* | 1.242<br>(1.123-1.373)* | 1.320<br>(1.177-1.480)* | 1.355<br>(1.148-1.601)* |
|                | Female | 1.041<br>(1.005-1.077)* | 1.257<br>(1.119-1.412)* | 1.385<br>(1.216-1.577)* | 1.482<br>(1.226-1.792)* |

AQI, air quality index; CI, confidence interval; df, degree of freedom; RR, relative risk.

\* $P < 0.05$ .

<sup>a</sup>Used in the study.
